# Supplementary material for: Hygiene, atopy and wheeze–eczema–rhinitis symptoms in schoolchildren from urban and rural Ecuador
Source: PubMed Central journal article supplement (PMC3932750; doi:10.1136/thoraxjnl-2013-203818), 2013-10-08
Supplement: thoraxjnl-2013-203818-s1.pdf [file thoraxjnl-2013-203818-s1.pdf]

Firma.....

Fecha...../...../200

1. NUMERO.....

**21. Instrucción del JEFE de la casa:**

- |                     |                            |                       |                             |
|---------------------|----------------------------|-----------------------|-----------------------------|
| primaria completa   | <input type="checkbox"/> 1 | primaria incompleta   | <input type="checkbox"/> 5  |
| secundaria completa | <input type="checkbox"/> 2 | secundaria incompleta | <input type="checkbox"/> 6  |
| superior completa   | <input type="checkbox"/> 3 | superior incompleta   | <input type="checkbox"/> 7  |
| analfabeto          | <input type="checkbox"/> 4 | No sabe               | <input type="checkbox"/> 99 |

**22. Lugar de nacimiento del jefe de la casa:**

.....(localidad/ ciudad/ provincia)

**23. El jefe de la casa se crió en zona:** urbana  1 rural  2 No sabe  99

**24. ¿Actualmente el jefe de la casa vive en una zona (rural o urbana) distinta a la que se crió?**

Si  1 No  0 No sabe  99

☛ Si la respuesta a la pregunta 24 es SI, indique si el jefe de la casa ha migrado de:

**25. Zona rural a urbana** Si  1 No  0

**26. Zona urbana a rural** Si  2 No  0

☛ Si el jefe de la casa ha migrado especificar la ocupación que tuvo antes de migrar:

**27. (De zona rural a urbana)** \_\_\_\_\_

**28. (De zona urbana a rural)** \_\_\_\_\_

**29. La relación entre el niño(a y la SEÑORA de la casa es:** Ausente  0

Madre  1 Madrastra  2 Abuela  3 Tía  Otro 5.....

**30. Ocupación de la SEÑORA de la casa (especificar):**

- |                       |                            |             |                             |             |                             |
|-----------------------|----------------------------|-------------|-----------------------------|-------------|-----------------------------|
| Quehaceres domésticos | <input type="checkbox"/> 1 | Profesora   | <input type="checkbox"/> 6  | Desempleada | <input type="checkbox"/> 11 |
| Empleada doméstica    | <input type="checkbox"/> 2 | Comerciante | <input type="checkbox"/> 7  | No sabe     | <input type="checkbox"/> 99 |
| Jornalera             | <input type="checkbox"/> 3 | Cocinera    | <input type="checkbox"/> 8  |             |                             |
| Agricultora           | <input type="checkbox"/> 4 | Partera     | <input type="checkbox"/> 9  |             |                             |
| Lavandera             | <input type="checkbox"/> 5 | Costurera   | <input type="checkbox"/> 10 |             |                             |

Otros (especifique) 12 \_\_\_\_\_

Firma.....

Fecha...../...../200

1. NUMERO.....

**31. Instrucción de la SEÑORA de la casa:**

- |                     |                            |                       |                             |
|---------------------|----------------------------|-----------------------|-----------------------------|
| primaria completa   | <input type="checkbox"/> 1 | primaria incompleta   | <input type="checkbox"/> 5  |
| secundaria completa | <input type="checkbox"/> 2 | secundaria incompleta | <input type="checkbox"/> 6  |
| superior completa   | <input type="checkbox"/> 3 | superior incompleta   | <input type="checkbox"/> 7  |
| analfabeta          | <input type="checkbox"/> 4 | No sabe               | <input type="checkbox"/> 99 |

**32. Lugar de nacimiento de la señora de la casa?**

.....(localidad/ ciudad/ provincia)

**33. La señora de la casa se crió en zona:** urbana  1 rural  2 No sabe  99

**34. ¿Actualmente si la señora de la casa vive en una zona (rural o urbana) distinta a la que se crió?**

Si  1 No  0 No sabe  99

☛ Si la respuesta a la pregunta 34 es SI, indique si la señora de la casa ha migrado de:

**35. Zona rural a urbana** Si  1 **36. Zona urbana a rural** Si  1

No  0

No  0

☛ Si la señora de la casa ha migrado especificar la ocupación que tuvo antes de migrar:

37. (De zona rural a urbana) \_\_\_\_\_

38. (De zona urbana a rural) \_\_\_\_\_

**39. ¿Cuánto es el ingreso mensual familiar?** \$.....  
(suma total del dinero que aportan todas las personas que viven en la casa)

40. Vive en casa: propia  1 arrendada  2 prestada  3

Firma.....

Fecha...../...../200

1. NUMERO.....

41. ¿Qué tipo de construcción tienen las paredes de la casa en la que vive el Niño(a)?

Madera  1 Ladrillo/ bloque/ cemento  4  
Mixta (madera/ caña)  2 Mixta (madera /cemento)  5  
Caña  3 Otro (especifique)  6 \_\_\_\_\_

42. ¿Cuántos cuartos (no se incluye los baños) existen en la casa? .....

43. ¿Cuántos dormitorios existen en la casa? .....

44. ¿Cuántas personas viven/ duermen permanentemente en la casa? .....

45. Usted utiliza:

Letrina  1 Servicio higiénico  2 Campo  3 Otro (especifique) 4 \_\_\_\_\_

46. ¿El baño lo comparte con otras familias? : Si  1 No  0

47. ¿Usted tiene Luz? Si  1 No  0

☛ ¿Qué artefactos eléctricos hay en la casa?

48. Refrigeradora Si  1 No  0 49. Televisión Si  1 No  0

50. Equipo de sonido Si  1 No  0 51. Radio Si  1 No  0

☛ **¿Qué material utiliza para cocinar?**

52. Gas Si  1 No  0      53. Carbón Si  1 No  0  
54. Leña Si  1 No  0      55. Otro (especifique) \_\_\_\_\_

☛ **¿En su casa tiene?**

56. Carro Si  1 No  0  
57. Canoa a motor Si  1 No  0

Firma.....

Fecha...../...../200

1. NUMERO.....

☛ **¿Cuáles son las fuentes principales de recolección de agua?**

58. Potable Si  1 No  0      59. Entubada Si  1 No  0      60. Pozo Si  1 No  0  
61. Río Si  1 No  0      62. Lluvia Si  1 No  0      63. Estero Si  1 No  0

64. Otras (especifique).....

65. **¿Uno de los padres /representantes/ familiares, se dedica a la agricultura o cría de animales domésticos para consumo de la casa?**

Si  1 No  0

☛ Si la respuesta a la pregunta 65 fue SI indicar el lugar en que se lo hace:

66. En la casa donde vive el niño(a) o sus alrededores Si  1 No  0

67. En una finca o terreno alejado de la casa en la que vive el niño(a) Si  1 No  0

C. Datos Generales

68. ¿Cuántos hijos son en la familia? .....

69. ¿Cuántos hermanos mayores tiene el niño? .....

70. ¿Cuántos hermanos menores tiene el niño(a)? .....

71. ¿Qué lugar ocupa el niño(a)? .....  
(llena el entrevistador, en relación a todos los hijos nacidos vivos de la madre)

72. ¿Cuántos niños (r. nacidos <15 años) viven permanentemente en la casa? .....

73. ¿Cuántos de los niños que viven en la casa permanentemente, son mayores que el niño(a)?  
.....

Firma.....

Fecha...../...../200

1. NUMERO.....

74. ¿Cuántos de los niños que viven permanentemente en la casa, son menores que el niño(a)?  
.....

75. ¿Qué lugar ocupa el niño(a) en relación a los niños que vive permanentemente en la casa?  
.....

76. ¿El niño(a) recibió lactancia materna? Si  1 No  0 No sabe  99

77. Si la respuesta anterior fue SI, hasta qué edad lo hizo?

|                          |                            |                 |                             |
|--------------------------|----------------------------|-----------------|-----------------------------|
| menos de 6 meses         | <input type="checkbox"/> 1 | mas de 24 meses | <input type="checkbox"/> 4  |
| De los 6 a los 12 meses  | <input type="checkbox"/> 2 | No sabe         | <input type="checkbox"/> 99 |
| De los 13 a los 24 meses | <input type="checkbox"/> 3 |                 |                             |

78. ¿Trajo el niño(a) o su representante el CARNET DE VACUNACIÓN?

Si  1 No  0

☛ Si la respuesta anterior fue SI, señale las dosis que se indica en el carnet:

| Vacunas que ha recibido el niño | Número de dosis de vacunas |                            |                            |                            |                            |
|---------------------------------|----------------------------|----------------------------|----------------------------|----------------------------|----------------------------|
| 79. BCG:                        | <input type="checkbox"/> 0 | <input type="checkbox"/> 1 | <input type="checkbox"/> 2 |                            |                            |
| 80. DTP:                        | <input type="checkbox"/> 0 | <input type="checkbox"/> 1 | <input type="checkbox"/> 2 | <input type="checkbox"/> 3 | <input type="checkbox"/> 4 |
| 81. SARAMPION:                  | <input type="checkbox"/> 0 | <input type="checkbox"/> 1 |                            |                            |                            |
| 82. POLIO:                      | <input type="checkbox"/> 0 | <input type="checkbox"/> 1 | <input type="checkbox"/> 2 | <input type="checkbox"/> 3 | <input type="checkbox"/> 4 |

☛ Si la respuesta anterior fue NO, señale las vacunas (cualquier número de dosis) que indica la madre o su representante:

83. BCG: Si  1 No  0 No sabe  99

84. DTP: Si  1 No  0 No sabe  99

85. SARAMPION: Si  1 No  0 No sabe  99

86. POLIO: Si  1 No  0 No sabe  99

87. Tiene el niño(a) la cicatriz de la vacuna BCG? Si  1 No  0

Firma.....

Fecha...../...../200

1. NUMERO.....

88. ¿Su niño(a) fue a la guardería?: Si  1 No  0 No sabe  99

89. A qué edad fue su niño a la guardería por primera vez.....meses

90. Si la respuesta anterior fue SI, por cuánto tiempo?.....meses

☛ Vamos a hablar sobre la frecuencia con que el niño(a) come o bebe los siguientes productos:

| Productos                      | Nunca<br>0 | A veces<br>1 | 1 vez al mes<br>2 | 1-4 veces por semana<br>3 | mas de 4 veces por semana (diario)<br>4 |
|--------------------------------|------------|--------------|-------------------|---------------------------|-----------------------------------------|
| 91. CARNES (res, cerdo, pollo) |            |              |                   |                           |                                         |
| 92. PESCADO                    |            |              |                   |                           |                                         |
| 93. CAMARONES                  |            |              |                   |                           |                                         |

|                   |  |  |  |  |  |
|-------------------|--|--|--|--|--|
| 94. FRUTAS        |  |  |  |  |  |
| 95. ENSALADAS     |  |  |  |  |  |
| 96. ARROZ         |  |  |  |  |  |
| 97. PLATANO       |  |  |  |  |  |
| 98. YUCA          |  |  |  |  |  |
| 99. PAN           |  |  |  |  |  |
| 100. MANI         |  |  |  |  |  |
| 101. PAPAS        |  |  |  |  |  |
| 102. HUEVOS       |  |  |  |  |  |
| 103. LECHE        |  |  |  |  |  |
| 104. COLAS        |  |  |  |  |  |
| 105. HAMBURGUESAS |  |  |  |  |  |

106. ¿El niño(a) consume leche cruda / ordeñada por lo menos 1 vez a la semana?

Si  1 No  0

107. ¿Durante el día cuántas horas mira la televisión el niño?

Nunca  0 A veces  1 1-3 h  2 4-5 h  3 más de 5 h  4

Firma.....

Fecha...../...../200

1. NUMERO.....

108. ¿Con que frecuencia el niño(a) hace ejercicios para que le falte el aire o la respiración?

a diario  1 cada 15 días  4  
3 veces por semana  2 1 vez al mes  5  
1 vez a la semana  3

☛ ¿Alguno de estos animales pasa dentro de la casa en la que vive el niño(a) ?  
(anotar si el animal pasa durante el día y/o la noche dentro de la casa en la que vive el niño)

109 Perro Si  1 No  0



110. Gato: Si  1 No  0

☛ ¿Alguno de estos animales pasa alrededor de la casa en la que vive el niño(a)?  
(anotar si los animales están la mayor parte del tiempo en el patio o jardín, así  
estos animales ingresen a la casa en forma esporádica).

111. Perro Si  1 No  0

112. Gato: Si  1 No  0

113. Cerdos Si  1 No  0

114. Gallinas Si  1 No  0

115. Otro Si  1 No  0

116. ¿El niño(a) tiene contacto con animales en fincas por lo menos una vez por  
semana?

Si  1 No  0

☛ ¿Alguna vez en la vida del niño(a), alguno de estos animales pasó /vivió  
dentro de la casa?

117. Perro Si  1 No  0

118. Gato Si  1 No  0

Firma.....

Fecha...../...../200

1. NUMERO.....

☛ ¿La madre del niño(a) ha presentado?

119. Asma Si  1 No  0 No Sabe  99

(algún médico le diagnosticó de ASMA o tuvo ataques de silbido al pecho 3 o más veces y  
por un lapso de 3 días)

120. Rinitis Si  1 No  0 No Sabe  99

(algún médico le diagnosticó de rinitis alérgica, o tuvo estornudos, moqueo, picazón de la  
nariz o lagrimeo/ picazón de los ojos, sin estar con gripe, más de una vez)

121. Eczema Si  1 No  0 No Sabe  99

(algún médico le diagnosticó de eczema o tuvo granos o ronchas que piquen, localizados en cuello, parte anterior del codo, posterior de la rodilla, tobillos y /o nalgas que aparecen y desaparecen y que duren por lo menos 6 meses)

☛ ¿El padre del niño(a) ha presentado?

122. Asma Si  1 No  0 No Sabe  99

(algún médico le diagnosticó de ASMA o tuvo ataques de silbido al pecho 3 o más veces y por un lapso de 3 días)

123. Rinitis Si  1 No  0 No Sabe  99

(algún médico le diagnosticó de rinitis alérgica, o tuvo estornudos, moqueo, picazón de la nariz o lagrimeo/picazón de los ojos, sin estar con gripe, más de una vez)

124. Eczema Si  1 No  0 No Sabe  99

(algún médico le diagnosticó de eczema o tuvo granos o ronchas que piquen, localizados en cuello, parte anterior del codo, posterior de la rodilla, tobillos y/o nalgas que aparecen y desaparecen y que duren por lo menos 6 meses)

Firma.....

Fecha...../...../200

1. NUMERO.....

☛ ¿Fuma o fumaba la madre del niño(a)?

125. En la actualidad Si  1 No  0 No sabe  99

126. Durante el embarazo Si  1 No  0 No sabe  99

127. En el primer año de vida del niño Si  1 No  0 No sabe  99

128. ¿Actualmente fuma alguien en la casa? Si  1 No  0

**D. Migración**

129. ¿Su niño(a) ha vivido en este lugar toda su vida? Si  1 No  0

☛ Si la respuesta anterior fue **NO** conteste la siguiente.

(Para contestar esta pregunta el niño tiene que haber pasado en el lugar 3 o más meses de su vida)

|                                   | <b>SITIOS</b><br>(localidad/ciudad/<br>provincia) | <b>TIEMPO</b><br>(meses o<br>años) | <b>Rural</b>                   | <b>Urbano</b>              |
|-----------------------------------|---------------------------------------------------|------------------------------------|--------------------------------|----------------------------|
| <b>130.</b> Primer año de vida    | <b>130</b>                                        | <b>174</b>                         | 175 1 <input type="checkbox"/> | 2 <input type="checkbox"/> |
| <b>131.</b> Primer año de vida    | <b>131</b>                                        | <b>176</b>                         | 177 1 <input type="checkbox"/> | 2 <input type="checkbox"/> |
| <b>132.</b> De los 2 a los 5 años | <b>132</b>                                        | <b>178</b>                         | 179 1 <input type="checkbox"/> | 2 <input type="checkbox"/> |
| <b>133.</b> De los 2 a los 5 años | <b>133</b>                                        | <b>180</b>                         | 180 1 <input type="checkbox"/> | 2 <input type="checkbox"/> |
| <b>134.</b> Mayor que 5 años      | <b>134</b>                                        | <b>182</b>                         | 183 1 <input type="checkbox"/> | 2 <input type="checkbox"/> |
| <b>135.</b> Mayor que 5 años      | <b>135</b>                                        | <b>184</b>                         | 185 1 <input type="checkbox"/> | 2 <input type="checkbox"/> |

136 ¿El niño(a) tiene familiares viviendo en Guayaquil? Si  1 No  0

137. Si la respuesta anterior fue **SI**, sabe la dirección (localidad/ barrio)?

|                          |
|--------------------------|
| <b>Relación Familiar</b> |
|--------------------------|

|                                      |
|--------------------------------------|
| <b>Dirección (localidad/ barrio)</b> |
|--------------------------------------|

|  |  |
|--|--|
|  |  |
|  |  |
|  |  |
|  |  |
|  |  |

Firma.....

Fecha...../...../200

1. NUMERO.....

138. ¿El niño(a) tiene familiares viviendo en la ciudad de Esmeraldas?

Si  1 No  0

139. Si la respuesta es SI, sabe la dirección (localidad/ barrio)?

| Relación Familiar | Dirección (localidad/ barrio) |
|-------------------|-------------------------------|
|                   |                               |
|                   |                               |
|                   |                               |
|                   |                               |
|                   |                               |
|                   |                               |

**E. Tratamiento antiparasitario**

140. ¿Cuándo fue la última vez que el niño(a) tomó purgante? .....meses

141. ¿Sabe el nombre del medicamento? \_\_\_\_\_

**F. Silbido**

142. ¿Alguna vez en la vida, el niño(a) tuvo silbido al pecho, (en cualquier época del pasado)?

Si  1 No  0 No Sabe  99

143. ¿El niño(a) ha tenido silbido al pecho en los últimos 12 meses (último año)?

Si  1 No  0 No Sabe  99

144. ¿Cuántos ataques o crisis de silbido al pecho, ha tenido el niño(a) en estos últimos 12 meses (último año)?

Ninguno  0 1 a 3  1 4 a 12  2 más de 12  3

145. ¿En estos últimos 12 meses (último año) cuántas veces el niño(a) se ha despertado en la noche debido al silbido al pecho?

Nunca ha despertado con silbido  0

Menos de una noche por semana  1

Una o más noches por semana  2

Firma.....

Fecha...../...../200

1. NUMERO.....

146. ¿En estos últimos 12 meses (último año) ha sido el silbido al pecho tan severo (o tan fuerte) como para no dejarlo hablar más de una o dos palabras entre cada respiración?

Si  1      No  0      No Sabe  99

147. ¿En estos últimos 12 meses (último año), el niño(a) ha tenido silbido al pecho durante o después de hacer ejercicio (correr, trabajar, etc.)?

Si  1      No  0      No Sabe  99

148. ¿Alguna vez en la vida el niño(a) fue diagnosticado de asma o bronquitis por un médico?

Si  1      No  0      No Sabe  99

149. ¿En estos últimos 12 meses (último año), el niño(a), ha tenido tos seca en la noche? (aparte de la asociada con resfríos, gripes, o a infecciones respiratorias)

Si  1      No  0      No Sabe  99

#### G. Rinitis

150. ¿Alguna vez en su vida, el niño(a), ha tenido problemas de estornudo, goteo de la nariz (moqueo), o que se le tape la nariz? (cuando no tenía resfrío común ni gripe)

Si  1      No  0      No Sabe  99

151. ¿En los últimos 12 meses, el niño, tuvo problemas de estornudo, goteo de la nariz (moqueo), o que se le tape la nariz? (cuando no tenía resfrío común ni gripe)

Si  1      No  0      No Sabe  99

152. ¿En los últimos 12 meses, al niño(a), junto con el problema de la nariz ¿le picaban y lloraban los ojos?

Si  1      No  0      No Sabe  99

Firma.....

Fecha...../...../200

1. NUMERO.....

153. ¿En los últimos 12 meses (último año) en que cantidad interfirieron estos problemas nasales con las actividades diarias del niño(a)?

En nada  0      Un poco  1      Moderadamente  2      Mucho  3

154. ¿Alguna vez en la vida el niño(a) fue diagnosticado por un médico de rinitis alérgica?

Si  1      No  0      No Sabe  99

#### H. Eczema

155. ¿El niño(a) ha tenido alguna vez en la vida granos o ronchas acompañados de picazón, que aparezcan y desaparezcan durante por lo menos 6 meses?

Si  1      No  0      No Sabe  99

156. ¿El niño(a) ha atendido éstas ronchas o granos con picazón en algún momento de estos últimos 12 meses ?

Si  1      No  0      No Sabe  99

☛ ¿Los granos o ronchas con picazón le han salido en alguno de los siguientes lugares?

|                                                | SI                         | NO                         |
|------------------------------------------------|----------------------------|----------------------------|
| 157. Alrededor de los ojos.....                | <input type="checkbox"/> 1 | <input type="checkbox"/> 0 |
| 158. Alrededor o parte frontal del cuello..... | <input type="checkbox"/> 1 | <input type="checkbox"/> 0 |
| 159. En las orejas.....                        | <input type="checkbox"/> 1 | <input type="checkbox"/> 0 |

160. Parte frontal de los codos.....  1  0  
 161. Detrás de las rodillas.....  1  0  
 162. Parte frontal de los tobillos.....  1  0  
 163. Nalgas.....  1  0

164. ¿A qué edad aparecieron los granos o ronchas por primera vez en el niño(a)?

\_\_\_\_\_

Firma.....

Fecha...../...../200

1. NUMERO.....

165. ¿Ha estado completamente sano de este problema de la piel (granos o ronchas con picazón) en algún momento en los últimos 12 meses (último año)?

Si  1 No  0

166. ¿Cuántas veces en los últimos 12 meses (último año) (en promedio) se ha mantenido despierto el niño durante la noche debido a la picazón con granos o ronchas?

Ninguna vez en los últimos 12 meses  0

Menos de una noche por semana  1

Una o más noches por semana  2

167. ¿Alguna vez un médico le ha diagnosticado al niño(a) de eczema o dermatitis atópica?

Si  1 No  0 No Sabe  99

**I. Fuente de información:**

168. Niño Si  1 No  0 169. Tía (o) Si  1 No  0

|                  |                               |                               |                    |                               |                               |
|------------------|-------------------------------|-------------------------------|--------------------|-------------------------------|-------------------------------|
| 170. Hermana (o) | Si <input type="checkbox"/> 1 | No <input type="checkbox"/> 0 | 171. Padre         | Si <input type="checkbox"/> 1 | No <input type="checkbox"/> 0 |
| 172. Madre       | Si <input type="checkbox"/> 1 | No <input type="checkbox"/> 0 | 173. Representante | Si <input type="checkbox"/> 1 | No <input type="checkbox"/> 0 |
