# Supplementary material for: Hygiene, atopy and wheeze–eczema–rhinitis symptoms in schoolchildren from urban and rural Ecuador
Source: PubMed Central journal article supplement (PMC3932750; doi:10.1136/thoraxjnl-2013-203818), 2013-10-08
Supplement: thoraxjnl-2013-203818-s2.pdf [file thoraxjnl-2013-203818-s2.pdf]

|                               |             | SPT  |       |     |       | Wheeze |       |     |       | Rhinitis |       |     |       | Eczema |       |     |       |
|-------------------------------|-------------|------|-------|-----|-------|--------|-------|-----|-------|----------|-------|-----|-------|--------|-------|-----|-------|
|                               |             | No   |       | Yes |       | No     |       | Yes |       | No       |       | Yes |       | No     |       | Yes |       |
|                               |             | N    | %     | N   | %     | N      | %     | N   | %     | N        | %     | N   | %     | N      | %     | N   | %     |
| Pets inside home              | No          | 2240 | 38.6% | 311 | 40.9% | 2355   | 39.3% | 242 | 37.2% | 2460     | 39.4% | 155 | 32.8% | 2513   | 39.3% | 121 | 33.6% |
|                               | Yes         | 3565 | 61.4% | 449 | 59.1% | 3641   | 60.7% | 409 | 62.8% | 3791     | 60.6% | 318 | 67.2% | 3878   | 60.7% | 239 | 66.4% |
| Crowding                      | < 3         | 1768 | 30.5% | 271 | 35.6% | 1845   | 30.8% | 204 | 31.4% | 1928     | 30.9% | 161 | 34.2% | 1972   | 30.9% | 121 | 33.6% |
|                               | >=3         | 4031 | 69.5% | 490 | 64.4% | 4149   | 69.2% | 445 | 68.6% | 4320     | 69.1% | 310 | 65.8% | 4414   | 69.1% | 239 | 66.4% |
| Birth order                   | <5th        | 4234 | 72.9% | 531 | 70.0% | 4311   | 71.9% | 503 | 77.4% | 4496     | 71.9% | 380 | 80.5% | 4614   | 72.2% | 275 | 76.6% |
|                               | >=5th       | 1571 | 27.1% | 228 | 30.0% | 1686   | 28.1% | 147 | 22.6% | 1756     | 28.1% | 92  | 19.5% | 1778   | 27.8% | 84  | 23.4% |
| Bathroom                      | Field       | 1482 | 25.5% | 181 | 23.8% | 1497   | 25.0% | 185 | 28.4% | 1557     | 24.9% | 144 | 30.4% | 1636   | 25.6% | 78  | 21.7% |
|                               | Others      | 4324 | 74.5% | 580 | 76.2% | 4501   | 75.0% | 466 | 71.6% | 4696     | 75.1% | 329 | 69.6% | 4757   | 74.4% | 282 | 78.3% |
| Potable drinking water        | No          | 3580 | 61.6% | 504 | 66.2% | 3711   | 61.9% | 432 | 66.3% | 3907     | 62.5% | 279 | 59.0% | 3993   | 62.4% | 222 | 61.7% |
|                               | Yes         | 2229 | 38.4% | 257 | 33.8% | 2289   | 38.2% | 220 | 33.7% | 2349     | 37.5% | 194 | 41.0% | 2403   | 37.6% | 138 | 38.3% |
| Attended daycare              | No          | 3155 | 55.0% | 419 | 55.9% | 3270   | 55.1% | 356 | 55.4% | 3419     | 55.4% | 249 | 52.9% | 3505   | 55.5% | 176 | 49.3% |
|                               | Yes         | 2577 | 45.0% | 330 | 44.1% | 2667   | 44.9% | 287 | 44.6% | 2758     | 44.6% | 222 | 47.1% | 2812   | 44.5% | 181 | 50.7% |
| House construction            | others      | 2825 | 48.6% | 345 | 45.3% | 2863   | 47.7% | 320 | 49.1% | 3018     | 48.2% | 215 | 45.5% | 3070   | 48.0% | 171 | 47.5% |
|                               | bamboo/wood | 2984 | 51.4% | 416 | 54.7% | 3137   | 52.3% | 332 | 50.9% | 3238     | 51.8% | 258 | 54.5% | 3326   | 52.0% | 189 | 52.5% |
| Father engaged in agriculture | No          | 3907 | 68.7% | 434 | 58.6% | 3947   | 67.1% | 445 | 69.7% | 4120     | 67.3% | 334 | 71.5% | 4252   | 67.9% | 221 | 63.0% |
|                               | Yes         | 1783 | 31.3% | 307 | 41.4% | 1935   | 32.9% | 193 | 30.3% | 2000     | 32.7% | 133 | 28.5% | 2011   | 32.1% | 130 | 37.0% |
| Contact with farm animals *   | No          | 4545 | 78.3% | 548 | 72.1% | 4650   | 77.6% | 502 | 77.1% | 4871     | 78.0% | 347 | 73.4% | 4982   | 78.0% | 259 | 71.9% |
|                               | Yes         | 1257 | 21.7% | 212 | 27.9% | 1343   | 22.4% | 149 | 22.9% | 1377     | 22.0% | 126 | 26.6% | 1406   | 22.0% | 101 | 28.1% |
| Unpasteurized milk †          | No          | 3478 | 60.0% | 431 | 56.9% | 3580   | 59.8% | 382 | 58.6% | 3717     | 59.5% | 279 | 59.0% | 3821   | 59.9% | 190 | 52.8% |
|                               | Yes         | 2321 | 40.0% | 326 | 43.1% | 2409   | 40.2% | 270 | 41.4% | 2525     | 40.5% | 194 | 41.0% | 2561   | 40.1% | 170 | 47.2% |
| Any geohelminth               | No          | 2221 | 39.4% | 363 | 49.7% | 2361   | 41.0% | 238 | 38.1% | 2432     | 40.5% | 192 | 41.9% | 2493   | 40.6% | 144 | 41.3% |
|                               | Yes         | 3410 | 60.6% | 367 | 50.3% | 3404   | 59.0% | 387 | 61.9% | 3573     | 59.5% | 266 | 58.1% | 3646   | 59.4% | 205 | 58.7% |
| A. lumbricoides               | No          | 3670 | 65.2% | 530 | 72.6% | 3802   | 65.9% | 411 | 65.8% | 3940     | 65.6% | 319 | 69.7% | 4049   | 66.0% | 228 | 65.3% |
|                               | Yes         | 1961 | 34.8% | 200 | 27.4% | 1963   | 34.1% | 214 | 34.2% | 2065     | 34.4% | 139 | 30.3% | 2090   | 34.0% | 121 | 34.7% |

|              |     |      |       |     |       |      |       |     |       |      |       |     |       |      |       |     |       |
|--------------|-----|------|-------|-----|-------|------|-------|-----|-------|------|-------|-----|-------|------|-------|-----|-------|
| T. trichiura | No  | 2897 | 51.4% | 459 | 62.9% | 3078 | 53.4% | 311 | 49.8% | 3178 | 52.9% | 235 | 51.3% | 3228 | 52.6% | 205 | 58.7% |
|              | Yes | 2734 | 48.6% | 271 | 37.1% | 2687 | 46.6% | 314 | 50.2% | 2827 | 47.1% | 223 | 48.7% | 2911 | 47.4% | 144 | 41.3% |
| Hookworm     | No  | 5351 | 95.0% | 681 | 93.3% | 5471 | 94.9% | 590 | 94.4% | 5690 | 94.8% | 440 | 96.1% | 5827 | 94.9% | 325 | 93.1% |
|              | Yes | 280  | 5.0%  | 49  | 6.7%  | 294  | 5.1%  | 35  | 5.6%  | 315  | 5.2%  | 18  | 3.9%  | 312  | 5.1%  | 24  | 6.9%  |

Supplementary Table 1. Frequencies of poor hygiene and farming exposures according to the presence and absence of allergen skin test reactivity (SPT), and recent symptoms of wheeze, rhinitis, and eczema in urban and rural schoolchildren combined. \*Pigs, cows, horses, mules, donkeys. † - Consumption of unpasteurized milk at least once weekly. Median crowding was 3 persons per sleeping room.

|                                                      | SPT<br>OR (95% CI)<br>p value |                           | Inter.<br>P<br>value | Wheeze<br>OR (95% CI)<br>p value       |                                            | Inter.<br>P<br>value | Rhinitis<br>OR (95% CI)<br>p value |                           | Inter.<br>P<br>value | Eczema<br>OR (95% CI)<br>p value |                          | Inter.<br>P<br>value |
|------------------------------------------------------|-------------------------------|---------------------------|----------------------|----------------------------------------|--------------------------------------------|----------------------|------------------------------------|---------------------------|----------------------|----------------------------------|--------------------------|----------------------|
|                                                      | Urban                         | Rural                     |                      | Urban                                  | Rural                                      |                      | Urban                              | Rural                     |                      | Urban                            | Rural                    |                      |
| Hygiene exposure                                     |                               |                           |                      |                                        |                                            |                      |                                    |                           |                      |                                  |                          |                      |
| Pets inside home<br>Yes vs. No                       | 0.75(0.57-0.98)<br>0.035      | 1.08(0.88-1.32)<br>0.451  | 0.036                | 1.16(0.88-1.55)<br>0.291               | 1.07(0.86-1.32)<br>0.560                   | 0.616                | 1.53(1.12-2.10)<br>0.007           | 1.22(0.93-1.60)<br>0.143  | 0.245                | 1.05(0.75-1.47)<br>0.779         | 1.37(1-1.87)<br>0.053    | 0.229                |
| Crowding<br>≥3 vs. <3                                | 0.73(0.55-0.96)<br>0.025      | 0.89(0.72-1.09)<br>0.261  | 0.297                | 1.03(0.77-1.39)<br>0.829               | 0.88(0.70-1.10)<br>0.254                   | 0.421                | 1.02(0.74-1.40)<br>0.901           | 0.77(0.59-1.01)<br>0.063  | 0.290                | 1.01(0.71-1.44)<br>0.942         | 0.84(0.62-1.15)<br>0.285 | 0.620                |
| Birth order<br>≥5 <sup>th</sup> vs. ≤4 <sup>th</sup> | 0.83(0.57-1.20)<br>0.317      | 1.16(0.95-1.41)<br>0.145  | 0.105                | <b>1.13(0.79-1.61)</b><br><b>0.497</b> | <b>0.63(0.50-0.80)</b><br><b>&lt;0.001</b> | <b>0.007</b>         | 0.80(0.53-1.22)<br>0.304           | 0.59(0.44-0.79)<br><0.001 | 0.292                | 0.97(0.62-1.52)<br>0.894         | 0.75(0.55-1.03)<br>0.079 | 0.413                |
| Bathroom<br>Field vs. others                         | 0.67(0.37-1.24)<br>0.202      | 0.92(0.74-1.14)<br>0.443  | 0.368                | 0.77(0.43-1.38)<br>0.382               | 1.17(0.93-1.47)<br>0.179                   | 0.187                | 0.86(0.47-1.58)<br>0.630           | 1.78(1.35-2.35)<br><0.001 | 0.032                | 0.53(0.23-1.21)<br>0.131         | 1.06(0.76-1.48)<br>0.722 | 0.095                |
| Potable drinking water<br>No vs. Yes                 | 0.87(0.48-1.57)<br>0.648      | 0.80(0.45-1.45)<br>0.477  | 0.896                | 1.25(0.71-2.20)<br>0.446               | 2.10(1.13-3.90)<br>0.019                   | 0.167                | 1.29(0.75-2.22)<br>0.363           | 2.66(1.24-5.72)<br>0.012  | 0.288                | 1.25(0.73-2.14)<br>0.420         | 2.78(0.92-8.39)<br>0.069 | 0.146                |
| Attended daycare<br>Yes vs. No                       | 1.17(0.89-1.53)<br>0.263      | 0.83(0.67-1.02)<br>0.073  | 0.046                | 0.91(0.69-1.21)<br>0.530               | 0.97(0.78-1.19)<br>0.767                   | 0.689                | 1.50(1.12-2.0)<br>0.007            | 0.95(0.73-1.24)<br>0.716  | 0.030                | 1.40(1-1.96)<br>0.047            | 1.19(0.88-1.61)<br>0.247 | 0.522                |
| House construction<br>Wood/bamboo vs. others         | 1(0.74-1.37)<br>0.954         | 1.07(0.86-1.32)<br>0.565  | 0.846                | 0.93(0.68-1.28)<br>0.669               | 0.86(0.68-1.07)<br>0.179                   | 0.690                | 1.14(0.83-1.59)<br>0.412           | 1.52(1.13-2.05)<br>0.006  | 0.254                | 0.87(0.59-1.27)<br>0.468         | 1.28(0.91-1.80)<br>0.150 | 0.080                |
| Father engaged in agriculture<br>Yes vs. No          | 0.94(0.53-1.68)<br>0.844      | 1.25(0.99-1.57)<br>0.057  | 0.367                | 0.96(0.53-1.74)<br>0.899               | 0.85(0.68-1.05)<br>0.144                   | 0.672                | 1.21(0.68-2.15)<br>0.514           | 1(0.75-1.34)<br>0.980     | 0.479                | 1.20(0.61-2.33)<br>0.600         | 1.11(0.79-1.55)<br>0.546 | 0.972                |
| Contact with farm animals*<br>Yes vs. No             | 0.89(0.54-1.46)<br>0.644      | 1.25(1-1.55)<br>0.042     | 0.203                | 1.02(0.63-1.66)<br>0.931               | 1.06(0.85-1.34)<br>0.599                   | 0.908                | 1.86(1.21-2.85)<br>0.005           | 1.42(1.07-1.87)<br>0.015  | 0.194                | 2.14(1.34-3.41)<br>0.002         | 1.29(0.94-1.78)<br>0.118 | 0.063                |
| Unpasteurized milk†<br>Yes vs. No                    | 1.16(0.88-1.53)<br>0.283      | 0.96(0.77-1.19)<br>0.683  | 0.257                | 0.88(0.66-1.18)<br>0.394               | 1.18(0.96-1.48)<br>0.118                   | 0.107                | 0.85(0.63-1.16)<br>0.312           | 1.23(0.93-1.61)<br>0.143  | 0.081                | 0.89(0.62-1.25)<br>0.494         | 1.46(1.05-2)<br>0.021    | 0.029                |
| Any geohelminth<br>Yes vs. No                        | 0.78(0.59-1.05)<br>0.109      | 0.58(0.47-0.72)<br><0.001 | 0.099                | 1.24(0.93-1.64)<br>0.136               | 0.97(0.76-1.22)<br>0.770                   | 0.216                | 0.86(0.63-1.16)<br>0.327           | 1.19(0.88-1.61)<br>0.246  | 0.135                | 0.95(0.67-1.34)<br>0.765         | 1.30(0.92-1.84)<br>0.132 | 0.118                |
| <i>A. lumbricoides</i><br>Yes vs. No                 | 0.60(0.40-0.91)<br>0.015      | 0.69(0.56-0.87)<br>0.001  | 0.556                | 0.74(0.51-1.09)<br>0.130               | 1.06(0.86-1.32)<br>0.571                   | 0.101                | 0.62(0.40-0.94)<br>0.027           | 1.09(0.84-1.44)<br>0.502  | 0.033                | 0.93(0.60-1.43)<br>0.738         | 1.20(0.88-1.65)<br>0.252 | 0.206                |
| <i>T. trichiura</i><br>Yes vs. No                    | 0.81(0.60-1.10)<br>0.181      | 0.59(0.48-0.73)<br><0.001 | 0.091                | 1.40(1.05-1.87)<br>0.020               | 0.95(0.76-1.19)<br>0.651                   | 0.044                | 0.98(0.72-1.34)<br>0.892           | 1.17(0.88-1.54)<br>0.282  | 0.351                | 1.01(0.71-1.44)<br>0.938         | 0.89(0.65-1.23)<br>0.504 | 0.868                |
| Hookworm<br>Yes vs. No                               | 1.18(0.57-2.45)<br>0.658      | 1.14(0.76-1.70)<br>0.526  | 0.975                | 1.69(0.84-3.41)<br>0.138               | 0.90(0.54-1.48)<br>0.683                   | 0.216                | 0.91(0.43-1.90)<br>0.803           | 0.80(0.41-1.58)<br>0.520  | 0.813                | 0.50(0.16-1.58)<br>0.238         | 1.76(1.02-3.03)<br>0.042 | 0.011                |

Supplementary Table 2. Associations between study outcomes and poor hygiene/farming exposures stratified by area of residence. Odds ratios (ORs) and 95% confidence intervals (95% CI) were calculated using random effects logistic regression in which clustering by rural community or urban neighbourhood was adjusted. Age and sex were included as *a priori* confounders and ethnicity, maternal educational level, household income and body mass index were considered as potential confounders and adjusted for where they had a significant effect on study outcomes. Interactions (inter.) with  $P \leq 0.01$  were considered relevant.

\*Pigs, cows, horses, mules, donkeys. † - Consumption of unpasteurized milk at least once weekly. Median crowding was 3 persons per sleeping room.



| Hygiene exposure                                     | Wheeze<br>OR (95% CI)<br>P value        |                                         | Inter. P<br>value | Rhinitis<br>OR (95% CI)<br>P value      |                                         | Inter. P<br>value | Eczema<br>OR (95% CI)<br>P value |                           | Inter. P<br>value |
|------------------------------------------------------|-----------------------------------------|-----------------------------------------|-------------------|-----------------------------------------|-----------------------------------------|-------------------|----------------------------------|---------------------------|-------------------|
|                                                      | SPT-                                    | SPT+                                    |                   | SPT-                                    | SPT+                                    |                   | SPT-                             | SPT+                      |                   |
|                                                      |                                         |                                         |                   |                                         |                                         |                   |                                  |                           |                   |
| Pets inside home<br>Yes vs. No                       | 1.08 (0.89-1.30)<br>0.449               | 1.30 (0.84-2.01)<br>0.245               | 0.470             | 1.54 (1.23-1.93)<br>0.001               | 0.80 (0.46-1.37)<br>0.410               | 0.019             | 1.27 (0.98-1.64)<br>0.071        | 1.22 (0.67-2.24)<br>0.516 | 0.724             |
| Crowding<br>≥3 vs. <3                                | 0.94 (0.77-1.15)<br>0.573               | 1.07 (0.69-1.67)<br>0.760               | 0.618             | 0.89 (0.71-1.11)<br>0.301               | 0.98 (0.55-1.74)<br>0.941               | 0.786             | 0.86 (0.67-1.12)<br>0.259        | 0.85 (0.46-1.59)<br>0.629 | 0.989             |
| Birth order<br>≥5 <sup>th</sup> vs. ≤4 <sup>th</sup> | 0.75 (0.60-0.93)<br>0.010               | 0.75 (0.47-1.23)<br>0.261               | 0.987             | 0.65 (0.50-0.84)<br>0.001               | 0.64 (0.32-1.25)<br>0.191               | 0.675             | 0.81 (0.61-1.08)<br>0.157        | 0.64 (0.32-1.27)<br>0.201 | 0.716             |
| Bathroom<br>Field vs. others                         | 1.18 (0.94-1.47)<br>0.147               | 0.97 (0.59-1.69)<br>0.899               | 0.355             | 1.53 (1.19-1.95)<br>0.001               | 0.80 (0.38-1.68)<br>0.550               | 0.027             | 0.92 (0.68-1.26)<br>0.616        | 0.90 (0.44-1.86)<br>0.778 | 0.768             |
| Potable drinking water<br>No vs. Yes                 | <b>1.42 (1.13-1.79)</b><br><b>0.002</b> | <b>0.74 (0.47-1.14)</b><br><b>0.172</b> | <b>0.010</b>      | <b>1.05 (0.79-1.40)</b><br><b>0.741</b> | <b>0.48 (0.26-0.88)</b><br><b>0.019</b> | <b>0.010</b>      | 0.99 (0.70-1.39)<br>0.949        | 0.87 (0.39-1.94)<br>0.726 | 0.623             |
| Attended daycare<br>Yes vs. No                       | 0.99 (0.82-1.19)<br>0.888               | 0.87 (0.56-1.33)<br>0.510               | 0.588             | 1.15 (0.93-1.42)<br>0.202               | 1.48 (0.85-2.57)<br>0.163               | 0.471             | 1.33 (1.04-1.70)<br>0.025        | 1.12 (0.62-2.02)<br>0.712 | 0.455             |
| House construction<br>Wood/bamboo vs. others         | 1.01 (0.84-1.23)<br>0.904               | 0.59 (0.38-0.90)<br>0.014               | 0.018             | <b>1.37 (1.09-1.72)</b><br><b>0.008</b> | <b>0.66 (0.36-1.21)</b><br><b>0.179</b> | <b>0.005</b>      | 1.03 (0.77-1.38)<br>0.858        | 0.79 (0.41-1.50)<br>0.466 | 0.462             |
| Father engaged in agriculture<br>Yes vs. No          | 0.95 (0.77-1.18)<br>0.663               | 0.77 (0.49-1.20)<br>0.247               | 0.465             | 0.87 (0.67-1.13)<br>0.285               | 1.04 (0.53-2.04)<br>0.920               | 0.775             | 1.03 (0.77-1.38)<br>0.858        | 1.55 (0.77-3.12)<br>0.220 | 0.484             |
| Contact with farm animals*<br>Yes vs. No             | 1.07 (0.85-1.34)<br>0.561               | 0.93 (0.57-1.51)<br>0.770               | 0.658             | 1.36 (1.05-1.75)<br>0.018               | 1.73 (0.92-3.26)<br>0.087               | 0.789             | 1.48 (1.11-1.97)<br>0.008        | 1.18 (0.61-2.32)<br>0.615 | 0.703             |
| Unpasteurized milk†<br>Yes vs. No                    | 1.05 (0.87-1.28)<br>0.584               | 1.08 (0.71-1.65)<br>0.718               | 0.892             | 1.02 (0.82-1.27)<br>0.856               | 1.18 (0.68-2.07)<br>0.560               | 0.666             | 1.12 (0.86-1.44)<br>0.396        | 1.47 (0.80-2.70)<br>0.218 | 0.663             |
| Any geohelminth<br>Yes vs. No                        | 1.22 (1.00-1.49)<br>0.055               | 0.87 (0.57-1.35)<br>0.543               | 0.130             | 1.02 (0.81-1.28)<br>0.877               | 0.95 (0.54-1.67)<br>0.860               | 0.675             | 1.01 (0.78-1.31)<br>0.919        | 1.32 (0.71-2.47)<br>0.384 | 0.376             |
| <i>A. lumbricoides</i><br>Yes vs. No                 | 1.00 (0.82-1.23)<br>0.971               | 1.25 (0.77-2.02)<br>0.362               | 0.487             | 0.83 (0.65-1.05)<br>0.116               | 1.50 (0.79-2.82)<br>0.212               | 0.202             | 0.94 (0.72-1.24)<br>0.679        | 1.88 (0.98-3.63)<br>0.058 | 0.062             |
| <i>T. trichiura</i><br>Yes vs. No                    | 1.23 (1.01-1.49)<br>0.037               | 0.85 (0.54-1.34)<br>0.472               | 0.094             | 1.14 (0.92-1.43)<br>0.235               | 0.78 (0.43-1.43)<br>0.431               | 0.194             | 0.86 (0.66-1.12)<br>0.257        | 0.96 (0.51-1.82)<br>0.907 | 0.690             |
| Hookworm<br>Yes vs. No                               | 1.09 (0.70-1.69)<br>0.700               | 1.21 (0.52-2.80)<br>0.658               | 0.854             | 0.64 (0.34-1.19)<br>0.156               | 2.00 (0.74-5.46)<br>0.174               | 0.057             | 1.21 (0.70-2.09)<br>0.490        | 0.96 (0.33-3.04)<br>0.991 | 0.884             |

Supplementary Table 3. Associations between study outcomes and poor hygiene/farming exposures stratified by allergen skin prick test reactivity (SPT). Odds ratios (ORs) and 95% confidence intervals (95% CI) were calculated using random effects logistic regression in which clustering by rural community or urban neighbourhood was adjusted. Age and sex were included as *a priori* confounders and ethnicity, maternal educational level, household income and body mass index were considered as potential confounders and adjusted for where they had a significant effect on study outcomes. Interactions (inter.) with  $P \leq 0.01$  were considered relevant.

\*Pigs, cows, horses, mules, donkeys. † - Consumption of unpasteurized milk at least once weekly. Median crowding was 3 persons per sleeping room.
